# Supplementary material for: Nanoporous graphene/single wall carbon nanohorn heterostructures with enhanced capacitance
Source: Royal Society of Chemistry journal article supplement (doi:10.1039/c5ta02580j), 2015-01-01
Supplement: c5ta02580j1.pdf [file c5ta02580j1.pdf]

## Electronic Supplementary Information

Nanoporous Graphene/Single Wall Carbon Nanohorns Heterostructures of

Enhanced Capacitance

K. P. Annamalai,<sup>a</sup> Jianping Gao,<sup>a</sup> Lile Liu,<sup>a</sup> Jun Mei,<sup>b</sup> Woonming Lau<sup>b</sup> and

Yousheng Tao<sup>\*a,b,c</sup>

<sup>a</sup>Key Laboratory of Design and Assembly of Functional Nanostructures, FJIRSM, Chinese Academy of Sciences (CAS), and Fujian Provincial Key Laboratory of Nanomaterials, Haixi

Institutes of CAS, Fuzhou 350002, China

<sup>b</sup>Chengdu Green Energy and Green Manufacturing Technology R&D Centre, Chengdu, 610207, China.

<sup>c</sup>College of the Environment and Ecology, Xiamen University, Xiamen 361102, China

Email: taoys@tom.com

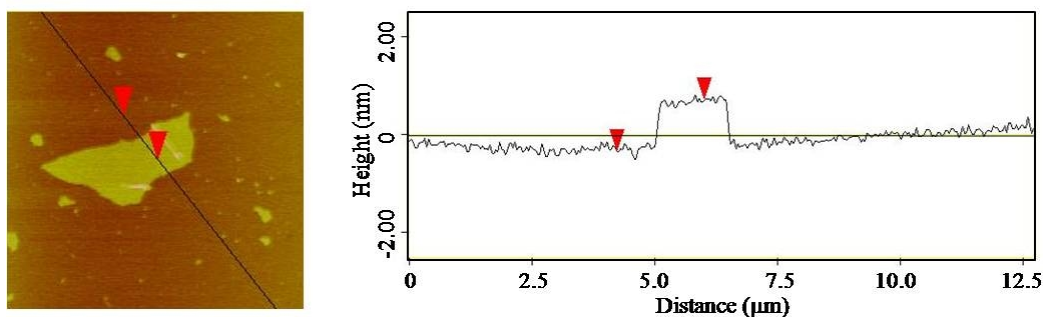

Figure S1. AFM scan of GO sheet, showing a layer height of less than 1 nm.

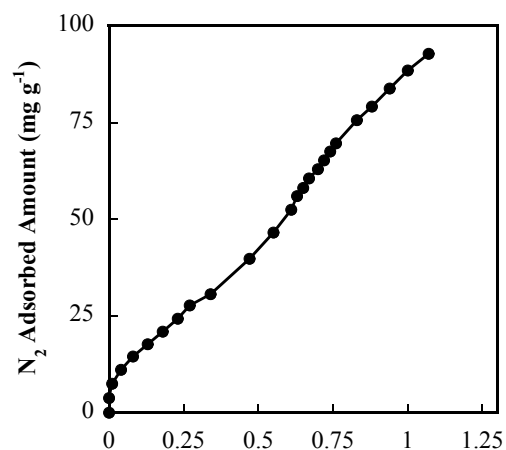

Figure S2.  $\alpha_s$ -plot of the nitrogen isotherms of the G/SWCNHs nanohybrid at 77 K.

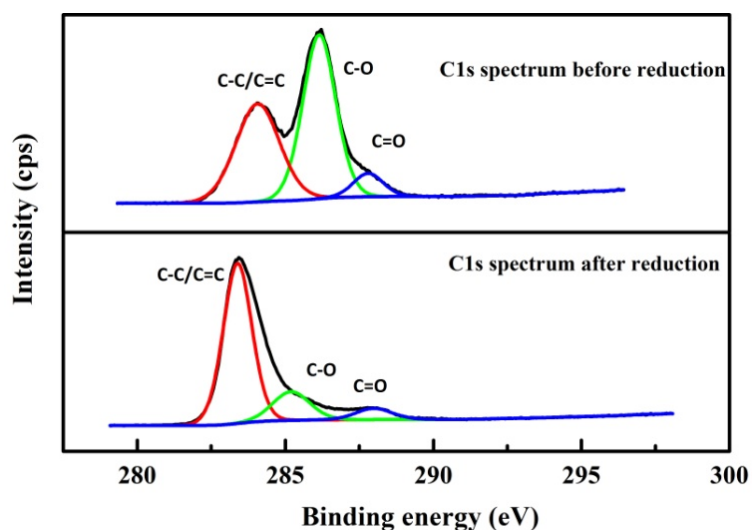

Figure S3. XPS C1s spectra of GO (top) and rGO (bottom). Peaks at 284.3, 286.7 and 288.5 eV were corresponding to C=C/C-C bond, C-O (such as epoxy and alkoxy groups) band and carboxyl functional groups, respectively. C1s XPS spectra clearly showed that after the

reduction C-O functional group peak was heavily suppressed; very low oxygen moieties after reduction indicated successful removal of oxygen functional groups. Atomic percentage of oxygen also supported this result. Before reduction, oxygen content (atomic percentage) was 37.7% and it decreased to 19.5% after reduction. It confirmed that hydrothermal reduction highly remove the oxygen functionalities from carbon surface.

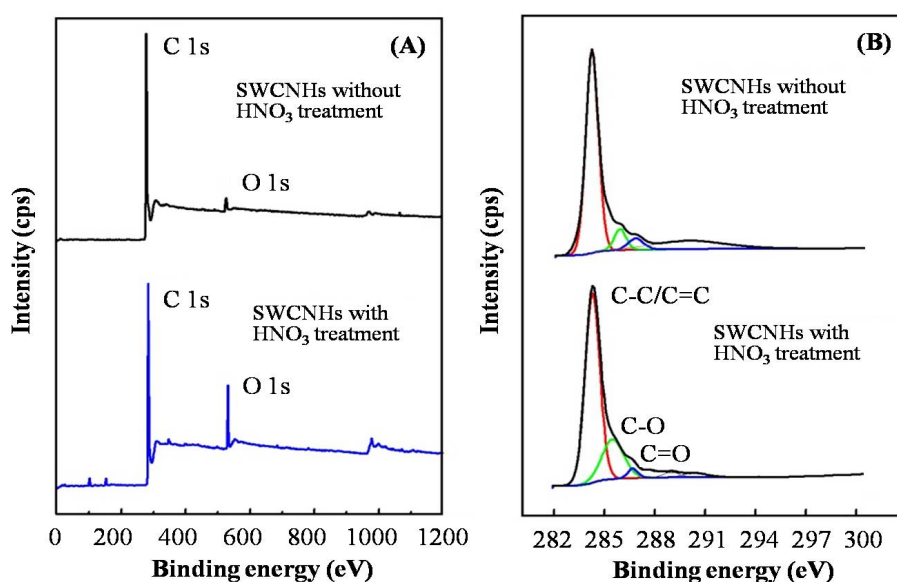

Figure S4. (A) XPS survey spectra and (B) XPS C1 spectra of SWCNHs with and without HNO<sub>3</sub> treatment. Peaks present in 284.1 and 531.9 eV belong to C 1s and O 1s peaks, respectively. It clearly describes that the oxygen content was increased in SWCNHs with HNO<sub>3</sub> treatment. The atomic ratio of O to C was increased from 0.04 to 0.14. As shown in Figure S4B, in the XPS C1s spectra of SWCNHs with HNO<sub>3</sub> treatment, C-O functional group peak was increased with comparison to SWCNHs without HNO<sub>3</sub> treatment.

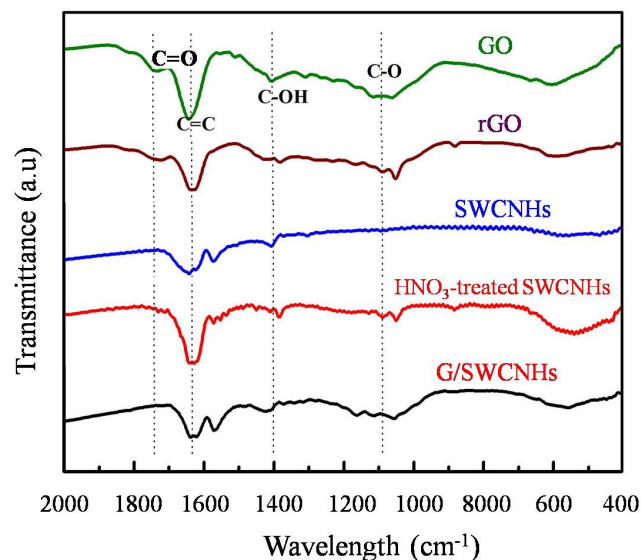

Figure S5. FT-IR spectra of G/SWCNHs nanohybrid and its individual components (rGO and SWCNHs with HNO<sub>3</sub> treatment). GO and SWCNHs (without HNO<sub>3</sub> treatment) were also included for comparison purpose. 1725 cm<sup>-1</sup> peak mainly belongs to C=O stretching vibrations of carbonyl and carboxyl groups. 1640 and 1403 cm<sup>-1</sup> peaks correspond to C=C and C-OH, respectively. Absorption band at 1108 cm<sup>-1</sup> is for C-O stretching vibrations of epoxy and alkoxy groups. In the case of SWCNHs with HNO<sub>3</sub> treatment, C-O stretching vibrations was increased. While, lower intensities of carbonyl or alkoxy and hydroxyl group vibration indicates the reduced functional groups on the nanostructures of rGO and G/SWCNHs.

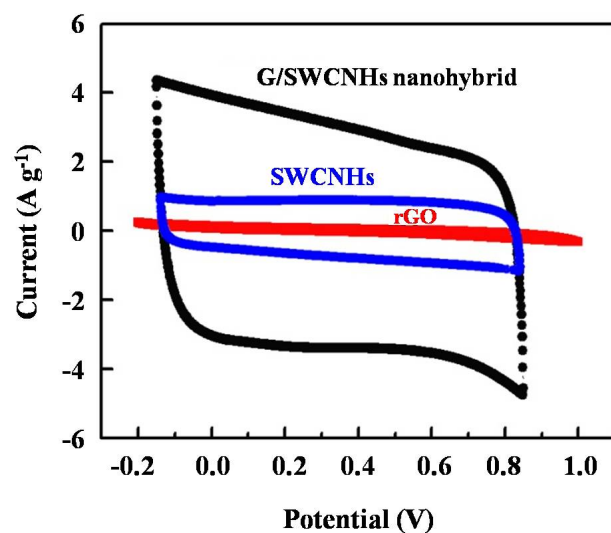

Figure S6. CV curves of G/SWCNHs nanohybrid with comparison to its individual components of rGO and SWCNHs in 1.0 M KOH aqueous electrolyte solution at  $25 \text{ mV s}^{-1}$  scan rate. Poor capacitance of rGO was mainly due to stacked layers which was not suitable for ion diffusion and transportation. G/SWCNHs nanohybrid exhibited  $211 \text{ F g}^{-1}$  capacitance at  $25 \text{ mV s}^{-1}$  scan rate with comparison to mere  $65 \text{ F g}^{-1}$  capacitance of SWCNHs.
